# Supplementary material for: Sea lamprey enlightens the origin of the coupling of retinoic acid signaling to vertebrate hindbrain segmentation
Source: Springer Nature journal article supplement (doi:10.1038/s41467-024-45911-x), 2024-02-20
Supplement: MOESM1 [file 41467_2024_45911_MOESM1_ESM.pdf]

**Supplementary information for article:**

**Sea lamprey enlightens the origin of the coupling of retinoic acid signaling to vertebrate hindbrain segmentation**

Alice M. H. Bedois<sup>1</sup>, Hugo J. Parker<sup>1</sup>, Andrew J. Price<sup>1</sup>, Jason A. Morrison<sup>1</sup>, Marianne E. Bronner<sup>2</sup> and Robb Krumlauf<sup>1,3,\*</sup>

<sup>1</sup> Stowers Institute for Medical Research, Kansas City, Missouri 64110, USA

<sup>2</sup> Division of Biology and Biological Engineering, California Institute of Technology, Pasadena, CA, 91125, USA

<sup>3</sup> Department of Anatomy and Cell Biology, Kansas University Medical Center, Kansas City, Kansas 66160, USA

\*Corresponding author and contact details:

Robb Krumlauf, Stowers Institute for Medical Research, 1000 East 50th, Kansas City, MO 64110, USA, Email: [rek@stowers.org](mailto:rek@stowers.org); Tel: 1-816-926-4051

## Vertebrate Cyp26A1

Pm 1 **MA**LLQLAITVTITIFTPLLLLATWKLWEKFLRDPSCLPLPPGSMGLPI**GET**LHYVLGRGSF**ME**KKRQRYG**PV**YR**TH**LG**FTPTVR**VI**GS**EN**VR**RL**LL**GE**HL**VA  
Rt 1 MVLVTLCATFLCTFVLPLALFVA**AV**KLWEVY**CI**SGR**PT**CEK**PL**PPGSMGL**P**LG**ET**LHLVLQRYK**FL**MMKVRKYGYIY**K**THLFG**NP**TVR**IM**GAEN**V**KQ**IL**GE**HK**LVS**V**  
Lc 1 MVLHSLFATVLCITFVLPLSLFLAAV**KL**WEIY**CV**SGR**DP**SCDR**PL**PPG**TM**GF**PL**GETLQ**ML**QRR**K**FLQ**MK**RRKYGYIY**K**THLFG**RP**TVR**VM**GAEN**R**Q**IL**GE**HL**VA  
Mm 1 **MG**LPA**L**LSALCTFVLPLSLFLAA**L**KLDLY**CV**SSRDR**SC**AL**PL**PPG**TM**GF**FF**GETLQ**ML**QRR**K**FLQ**MK**RRKYGYIY**K**THLFG**RP**TVR**VM**GAD**N**VR**RL**ILGE**HL**LVS**V**  
  
Pm 111 **Q**W**P**TSV**S**RL**I**GA**G**CLSS**F**EGA**HR**MK**K**V**L**KA**S**REALQ**NY**VP**T**IVE**VS**AM**L**AD**CS**RS**-**RPV**LV**Y**PE**V**K**LV**M**F**R**AM**R**L**L**GI**D**VS**G**MA**R**G**-**E**I**HA**L**V**G**V**F**E**E**M**I**R**N**  
Rt 111 **Q**W**P**ASV**R**T**L**GA**CS**LN**L**HSE**HK**RR**K**V**L**KA**S**REALQ**NY**VP**M**G**E**E**I**RAG**V**RR**LD**SG**-**CV**LV**Y**PE**M**K**RL**M**F**G**IAM**R**IL**L**GF**E**PTH**S****-**P**Q**TQ**Q**EL**I**Q**V**F**E**E**M**I**R**N  
Lc 111 **Q**W**P**ASV**R**T**L**GS**G**CL**N**LHDS**Q**HK**RR**K**V**IM**K**AF**S**Q**AL**EN**I**VP**I**VE**VS**AV**C**Q**LN**SSGS**-**CV**LV**Y**PE**V**K**RL**M**F**R**IA**M**RI**L**LGF**E**PQ**T**K**-**P**E**N**E**LQ**L**VE**A**F**E**E**M**I**R**N  
Mm 111 **H**W**P**AL**S**RL**T**GA**G**CL**N**LHDS**SH**K**RR**K**V**IM**Q**AF**S**REALQ**CV**Y**P**IA**E**EV**SS**CL**Q**N**L**SC**G**ER**GL**LV**Y**PE**V**K**R**L**M**F**R**IA**M**RI**L**L**G**CE**P**G**A**GG**E**DE**Q**L**VE**A**F**E**E**M**TR**N  
  
Pm 219 **L**FS**L**PI**E**VP**F**GG**LY**R**GL**KAR**N**VI**HS**K**IE**ES**I**KK**L**SS**P**----PTD**G**CK**D**ALQ**ML**IE**HS**RE**NG**NC**L**S**L**Q**L**K**E**SA**T**ELL**FG**GH**ET**TAS**A**AT**S**LV**M**HL**A**I**HP**H**V**RS**R**L**R**SE**L**  
Rt 219 **L**FS**L**PI**D**VP**F**SG**LY**R**GL**KAR**N**VI**HA**K**IE**EN**I**R**K**K**V**ARR**---**EST**G**Q**F**K**D**ALQ**L**L**IE**Q**S**EQ**LP**RL**Q**EL**K**ESA**T**ELL**FG**GH**ET**TAS**A**T**S**LV**T**FL**A**L**H**RE**V**LQ**K**V**R**RE**L**  
Lc 219 **L**FS**L**PI**D**VP**F**SG**LY**R**GL**KAR**N**VI**HE**K**IE**EN**I**K**A**L**T**K**P**----NT**E**TQ**H**Q**D**VLQ**L**L**IE**Q**E**Y**K**ENG**E**Q**LN**MQ**EL**K**E**SA**T**ELL**FG**GH**ET**TAS**A**AT**S**L**I**T**FL**GL**H**HE**V**LE**K**V**R**KE**L**  
Mm 221 **L**FS**L**PI**D**VP**F**SG**LY**R**GV**KAR**N**L**I**HA**R**IE**N**IR**A**K**IR**RLQ**A**TE**P**DG**G**CK**D**ALQ**L**L**IE**HS**W**ER**GE**RL**D**MQ**AL**K**Q**SS**T**ELL**FG**GH**ET**TAS**A**AT**S**L**I**T**LY**GL**Y**PH**V**LQ**K**V**R**E**E**L  
  
Pm 325 KQ**Q**G**F**TA**E**RT**---**ISS**L**AE**L**E**L**K**F**VA**S**AV**K**ET**LR**V**SP**PA**G**GF**R**VA**L**K**T**FE**IN**G**Y**Q**IP**K**G**W**N**VI**YS**I**K**ETH**N**MA**EN**F**P**K**R**ND**FD**PD**R**W**MT**G**D**AG**G**NG**D**A**SS**R**F**T**Y**  
Rt 326 QE**Q**GL**L**SSD**G**TE**I**R**H**IT**M**EL**EQ**L**K**Y**T**GS**VI**K**ET**LR**L**SP**P**GG**F**RV**A**L**K**TF**VI**NG**Y**Q**IP**K**G**W**N**VI**YS**I**C**D**TH**X**AT**N**F**SK**K**DE**F**N**P**DR**F**ME**G**CS**-----**END**S**CR**F**S**Y**  
Lc 326 K**T**KE**L**CE**H**HK**D**KN**Y**L**D**ME**V**LE**Q**L**K**Y**T**GS**II**K**ET**LR**L**SP**P**GG**F**RV**A**L**K**TF**EL**SG**Y**Q**IP**K**G**W**N**VI**YS**I**C**D**TH**Q**AD**IT**SN**K**Q**E**F**N**P**DR**F**MS**S**Y**-----**ED**S**R**F**S**F**  
Mm 331 K**S**GL**L**CK**S**ND**Q**N**K**-L**D**ME**T**LE**Q**L**K**Y**T**GC**VI**K**ET**LR**L**NP**P**GG**F**RV**A**L**K**TF**EL**NG**Y**Q**IP**K**G**W**N**VI**YS**I**C**D**TH**Q**AD**IT**FN**KE**E**F**N**DR**F**I**V**PH**P**-----ED**A**S**R**F**S**F  
  
Pm 431 **I**PF**GG**GS**R**SC**V**G**K**E**L**AR**L**IL**RI**V**V**VEL**CR**CE**ML**P**NG**P**PT**LV**T**AP**S**LV**PD**N**L**PAR**FS**A**S**ADD**WR**  
Rt 430 **I**PF**GG**GS**R**SC**V**G**K**E**F**AK**IL**L**K**IFT**VEL**VR**AC**D**W**ELL**NG**P**PT**M**K**NT**NP**Y**VP**DN**L**PT**K**TF**P**Y**NI**--  
Lc 429 **I**PF**GG**GS**R**SC**V**G**K**E**F**AK**IL**L**K**IFT**VEL**AS**SC**D**W**QL**NG**P**PT**M**K**T**G**TV**Y**PD**N**LPT**K**TF**TH**FN**CK**T--  
Mm 433 **I**PF**GG**GL**R**SC**V**G**K**E**F**AK**IL**L**K**IFT**VEL**AR**H**CD**W**QL**NG**P**PT**M**K**T**SP**TV**Y**PD**N**L**PAR**TF**TH**Q**DI**--  
  
Heme

## Vertebrate Cyp26B1/C1

CcCyp26C1 1 ---M**F**LL**G**Y**V**Y**L**SALAT**A**L**T**SL**S**VL**L**LLAV**S**RQ**L**W**L**GN**V**TR**D**R-G**N**K**L**PL**P**K**G**SM**G**W**P**LL**G**ET**L**H**M**V**Q**GS**H**FAS**R**RE**K**Y**GN**V**F**K**TH**LL**GR**P**V**I**R**VT**GA**EN**I**R**K**IL  
LcCyp26C1 1 ---M**F**LL**E**FS**V**Y**I**VD**I**IT**S**IM**S**LL**L**AV**S**RQ**L**W**L**IR**N**L**T**R**D**R-G**S**K**L**PL**P**K**G**SM**G**W**P**LG**ET**M**H**LV**Q**GS**N**F**H**CR**R**K**Y**GN**V**F**K**TH**LL**GR**P**V**I**R**VT**GA**EN**I**R**IL  
MmCyp26C1 1 ---M**I**SW**G**LS**C**SV**L**GAAG**T**LL**C**AG**L**LL**G**LAQ**L**W**L**R**W**TS**L**R**D**W-AST**L**PL**P**K**G**SM**G**W**P**FF**GE**T**L**H**W**LV**Q**GS**R**F**H**SS**R**RE**R**Y**GT**V**F**K**TH**LL**GR**P**V**I**R**VS**GA**EN**V**R**IT**L  
PmCyp26B1/C1b 1 MAM**E**LG**A**LV**A**SV**L**AS**L**AS**A**AG**L**GS**A**LL**L**LV**S**Q**L**W**A**M**R**WA**AT**R**D**-S**CK**L**PL**PS**G**SM**G**LP**L**IG**ES**L**H**W**V**QGS**R**F**H**SS**R**AR**H**GN**V**F**K**TH**LL**GR**P**V**I**R**VT**GA**Q**Y**V**R**IL**  
EbCyp26\_10538 1 ---ML**G**A-L**G**AL**S**V**L**ATA**V**AC**L**MS**L**V**LL**LA**V**AQ**L**W**L**W**R**TA**R**DR-**A**FQ**L**PL**P**K**G**SM**G**LP**L**IG**ET**L**H**M**V**Q**G**AN**F**HS**S**RR**E**K**F**GN**V**F**K**TH**LL**GR**P**V**I**R**VT**GA**E**Y**R**K**II**  
EbCyp26\_6009 1 -----ML**G**A---T**TA**ST**F**PC**R**AP**W**AF**P**W**E**K**S**IG**S**C**R**Q**VI**ST**L**-----L**A**VS**S**---A**M**Y**S**K**P**T**C**W**A**G**P**V**V**RV**T**GG**E**N**V**R**IL**  
PmCyp26B1/C1a 1 ---M**L**LS**L**PS**L**DA**V**SA**A**SV**T**AC**L**AS**L**V**LL**TV**V**Q**L**W**L**RL**R**NS**A**DR**K**-S**S**AL**PL**PS**G**SM**G**FP**V**VG**ET**F**H**M**V**QGS**R**F**H**SS**R**RE**R**Y**GN**V**F**K**TH**LL**GR**P**V**I**R**VT**GA**EN**V**R**IL**  
RtCyp26B1 1 ---M**F**W**E**GL**S**VA**S**AV**TT**AC**L**VS**LL**LL**L**TV**S**RQ**L**W**Q**F**R**TV**S**R**D**K-NC**N**L**P**IP**K**G**S**M**G**LP**L**IG**ET**F**H**W**VE**GS**R**F**H**SS**R**RE**K**Y**GN**V**F**K**TH**LL**GR**P**L**I**R**VT**G**SE**N**V**R**K**IL**  
LcCyp26B1 1 -----M**S**L**T**LA**A**CL**S**V**IL**LL**L**AV**S**Q**L**W**L**R**WA**AT**R**D**K**-NC**K**L**P**IP**K**G**S**M**G**FP**I**IG**ET**F**H**W**L**Q**S**E**F**Q**S**SR**E**K**Y**GN**V**F**K**TH**LL**GR**P**L**I**R**VT**GAD**N**V**R**K**IL**  
MmCyp26B1 1 ---M**L**FE**G**EL**S**VA**L**AT**LA**AC**L**VS**VT**LL**L**AV**S**Q**L**W**L**R**WA**AT**R**D**K**-S**CK**L**P**IP**K**G**S**M**G**FP**L**IG**ET**G**H**W**L**Q**S**G**F**Q**S**SR**E**K**Y**GN**V**F**K**TH**LL**GR**P**L**I**R**VT**GA**EN**V**R**K**IL**  
  
CcCyp26C1 107 L**G**EH**S**LV**S**QA**W**PH**S**TR**IL**L**G**FN**T**LAN**S**I**G**DL**HR**Q**R**KK**L**MA**R**VF**S**HA**AL**DT**Y**PI**G**I**Q**LV**S**R**SV**RG**W**CRE**P**-AP**V**AV**Y**PA**T**K**AL**TF**CI**A**IR**ILL**GL**RA**AD**Q**L**DR**S**TS**F**E  
LcCyp26C1 107 L**G**EH**S**LV**S**TQ**W**PH**S**TR**IL**L**G**PN**T**LV**NS**NG**L**HR**Q**R**K**IL**A**K**V**FS**HT**AL**E**IF**L**PI**R**IQ**L**VR**GE**I**Q**GW**CRE**Q-AA**I**AV**Y**PA**T**K**AL**TF**RI**A**VR**ILL**GL**S**ID**DR**Q**LQ**N**L**A**KT**F**E  
MmCyp26C1 107 L**G**EH**R**L**V**RS**Q**W**PH**S**A**HL**L**GS**HT**L**G**AV**GE**PH**R**Q**R**K**L**VA**R**VF**S**RS**SL**EQ**F**VP**RL**Q**G**AL**R**RE**V**RS**W**CA**Q**-RP**V**AV**Y**QA**A**K**AL**TF**RM**A**AR**ILL**GL**Q**D**EA**R**CT**E**LA**HT**F**E**  
PmCyp26B1/C1b 110 M**G**EH**A**LV**S**AC**W**PA**S**TR**ML**LG**S**N**L**INS**A**GE**A**HR**TR**R**K**VL**S**K**V**FS**RA**AL**ES**Y**A**GV**AR**V**V**RA**AV**RE**WR**AR**AG**AE**VR**Y**P**AC**Q**AL**M**F**R**AV**RV**L**L**GL**E**PS**PD**MT**F**S**AD**FT  
EbCyp26\_10538 106 M**G**EH**S**LV**S**QA**W**PK**S**VR**LL**L**G**DT**L**NS**V**GD**V**HR**H**K**R**L**L**FS**K**VS**R**T**AL**EN**Y**L**P**Q**L**Q**A**VA**R**AV**S**WR**AP**-DE**V**N**V**Y**PE**Q**AL**TF**H**VA**RV**L**L**GL**R**PS**E**AD**MT**R**I**GA**F**K**A**F  
EbCyp26\_6009 70 M**G**EH**Q**L**V**LS**Q**W**PH**S**TR**RL**L**GS**SA**F**I**NS**V**GD**I**HR**F**K**R**K**VM**TP**VL**S**HA**LES**Y**LP**S**IQ**H**V**R**DA**V**SA**W**SA**S**L-T**P**TT**V**Y**P**ACK**N**L**TF**RI**A**MR**V**LL**GF**R**PS**DA**E**LEN**S**N**V**E  
PmCyp26B1/C1a 108 M**G**EH**A**LV**S**Q**W**PL**S**TR**LL**L**G**AN**S**L**G**MS**V**GD**A**HR**N**K**R**K**V**MA**Q**VF**S**HA**AL**E**G**Y**L**P**Q**V**Q**LV**M**VA**AV**SR**W**RD**CA**-SV**T**TV**Y**PE**CK**TL**TF**RV**AL**HW**V**SS**R**IA**P**HE**A**L**LA**DA**F**E  
RtCyp26B1 107 M**G**EH**T**LV**S**Q**W**PR**S**TR**ML**LG**S**T**L**INS**I**GD**I**HR**Q**K**R**IF**A**K**V**FS**HY**AL**EC**Y**L**PK**I**Q**AI**Q**D**GR**D**W**SS**SG-EP**I**TV**Y**HE**AK**KL**TF**RI**A**VR**VL**LG**F**RV**S**ET**E**LN**L**SE**S**F**E**  
LcCyp26B1 98 M**G**EH**T**LV**S**TE**W**PR**S**TR**ML**LG**PN**SL**V**NS**I**GD**I**HR**N**K**R**K**V**FS**K**LS**HE**AL**ES**Y**L**PK**I**Q**V**I**Q**DN**L**RE**W**SS**N**P-EP**I**N**V**Y**R**ES**Q**KL**TF**RI**A**MR**V**LL**GF**R**VS**EE**M**HN**L**FE**A**F**Q**  
MmCyp26B1 107 L**G**EH**Q**L**V**ST**EW**PR**S**AR**VL**LG**PN**T**V**AN**S**I**GD**I**HR**N**K**R**K**V**F**SK**FS**HE**A**LES**Y**L**PK**I**Q**L**V**I**Q**DT**L**RA**W**SS**Q**-EA**I**N**V**Y**Q**E**A**Q**RL**TF**RM**AV**RV**L**L**GF**S**I**P**E**ED**L**G**HL**F**EV**V**Q  
  
CcCyp26C1 216 EL**M**EN**I**FS**L**PL**VD**PF**S**GL**R**K**G**IK**A**R**N**VL**H**EY**L**E**K**A**IT**E**K**L**Q**RT**S**---RG**A**Y**P**D**AL**D**V**ML**NS**ARE**NG**KE**PN**LQ**EL**KE**V**AV**E**L**I**FA**A**F**ST**T**A**SA**S**TS**L**V**LL**LL**Q**HS**Q**ARE**K**V**R**  
LcCyp26C1 216 Q**L**ID**N**L**FS**L**PL**DI**PF**CG**L**R**K**G**K**ARD**T**L**H**EY**M**E**K**A**IT**E**K**L**Q**KK**H**---SE**G**Y**H**D**AL**DF**MM**SS**A**K**E**L**G**VEL**SM**Q**EL**KE**S**AV**E**L**I**FA**A**F**ST**T**A**SA**S**TS**L**IL**Q**LL**K**HP**F**AVE**K**V**R**  
MmCyp26C1 216 Q**L**VEN**L**FS**L**PL**VD**PF**S**GL**R**K**G**IR**AR**D**Q**L**Y**E**H**LDE**A**VA**E**L**K**Q**E**K---T**A**EP**G**D**ALL**I**NS**ARE**L**GH**EP**S**V**Q**EL**KE**L**AV**ELL**FA**A**F**FT**T**A**SA**S**TS**L**LL**L**Q**HP**AA**IT**K**I**Q  
PmCyp26B1/C1b 220 Q**V**DN**I**FS**L**PL**VD**PF**S**GL**R**K**G**LR**AR**D**S**MM**H**K**F**LE**ST**L**SE**L**AS**R**H**AG**GR**T**H**AD**A**DI**Y**ME**S**ARE**Q**E**I**LS**A**KE**I**KE**A**AV**E**L**I**FA**A**Y**ST**T**A**SA**S**CT**S**LV**LL**LL**L**HP**E**AL**A**K**L**R  
EbCyp26\_10538 215 Q**V**AN**I**FS**L**PL**VD**PF**S**GL**R**K**G**LR**Q**AR**E**L**H**NY**L**ET**AL**RE**L**KA**AR**D**S**ES**G**ED**AM**D**Y**LES**A**RE**Q**GIS**I**S**I**KE**L**KE**A**AV**E**L**I**FA**A**Y**ST**T**S**SA**S**CT**S**LV**LQ**LL**L**HP**V**LE**K**L**R**  
EbCyp26\_6009 179 Q**V**EN**L**FS**L**PL**VD**PF**S**GL**R**K**G**IN**AR**N**K**L**HL**FL**E**K**F**IL**E**K**LE**SE---T**K**D**Y**D**AL**D**IL**IS**SA**N**H**Q**D**K**S**MS**M**EL**EL**KE**A**AV**E**L**I**FA**A**Y**ST**T**A**SA**S**TS**L**LQ**L**L**K**HP**AV**L**T**K**L**Q  
PmCyp26B1/C1a 217 Q**V**EN**F**FS**L**PL**VD**PF**S**GL**R**K**G**L**K**AR**K**VL**H**GY**L**DK**L**RD**K**LER**PE**---F**K**ES**Q**D**AM**D**IL**IS**SA**KE**H**G**K**EMS**M**EL**EL**KE**A**AV**E**L**I**FA**A**H**AT**T**A**SA**S**TS**L**V**LQ**ML**K**HP**D**OT**L**AR**L**  
RtCyp26B1 216 Q**L**AN**I**FS**L**PL**VD**PF**S**GY**R**K**G**MR**AR**DN**L**HY**K**LE**K**A**IT**E**K**L**Q**Y**KE**---E**K**D**Y**S**D**AM**D**IL**IS**ARE**Q**G**K**EL**T**MQ**EL**KE**ST**VEL**I**FA**A**F**AT**T**S**AT**S**LV**YL**Q**L**HP**L**VE**K**L**R**  
LcCyp26B1 207 Q**F**EN**I**FS**L**PL**VD**PF**S**GY**R**R**G**I**C**AR**S**LE**K**GLE**K**A**IT**E**K**L**Q**SN**Q**---G**K**D**Y**AD**AL**D**IL**IES**SK**ENS**RE**LS**MQ**EL**K**D**AT**IEL**I**FA**A**F**AT**T**A**SA**S**TS**L**MQ**L**L**K**HP**V**VL**E**K**L**H  
MmCyp26B1 216 Q**V**EN**V**FS**L**PL**VD**PF**S**GY**R**R**G**I**Q**AR**Q**IL**Q**K**L**E**K**A**IT**E**K**L**Q**CT**Q**---G**K**D**Y**S**D**AL**D**IL**IES**KE**H**G**K**EM**T**MQ**EL**K**D**GT**EL**I**FA**Y**A**Y**AT**T**A**SA**S**TS**L**MQ**L**L**K**HP**AV**LE**K**L**R**  
  
CcCyp26C1 324 Q**E**LE**Q**HS**L**IR**N**Y**GE**F-----  
LcCyp26C1 324 R**E**LV**S**H**G**IL**N**CH**CL**-----  
MmCyp26C1 324 Q**E**LS**A**Q**L**GR**A**CT**CT**-----P**R**A-----  
PmCyp26B1/C1b 330 A**E**LRA**H**GL**P**E**A**PC**CG**CA**HR**PD**A**AD**A**AA**S**R**PH**A**E**GA**G**IS**T**SPA**E**E**A**GD**ASA**--V**R**LE**G**HR**RA**E**G**EP**G**-----G**E**TE**G**K**RED**G---R**R**T**A**SG**A**RE**W**Q**N**-----  
EbCyp26\_10538 325 A**E**LRA**H**AV**P**PL**G**C---T**C**RP**AD**ME**I**-----  
EbCyp26\_6009 287 E**E**LVD**A**GL**S**PP**PT**D-----  
PmCyp26B1/C1a 325 R**E**LA**D**AG**L**GG**G**PA**AAA**-----  
RtCyp26B1 324 E**E**LR**S**NG**I**L**H**N-G-----  
LcCyp26B1 315 E**E**LR**S**NG**I**L**H**N-G-----  
MmCyp26B1 324 E**E**LA**R**Q**L**L**H**GG**G**-----  
  
CcCyp26C1 338 ---PG-----AA**V**I**Q**SE**T**A**Q**MS**R**NC-DC**Q**H**I**N**L**DT**L**SR**L**RY**L**DC**V**VE**V**L**R**LL**PP**VS**GG**Y**R**T**AL**Q**T**FE**L**NG**C**Q**IP**K**G**W**N**II**YS**I**R**D**T**Q**E**TA**A**V**Y**LN-P**D**T  
LcCyp26C1 430 DES**C**PQ**S**VI**T**Q**N**K**MS**HS**C**NS**AD**FT**NN**L**V**K**I**T**N**VC-EC**Q**PH**L**N**D**K**L**SR**L**C**Y**LG**CV**VE**V**L**R**LL**PP**VS**GG**Y**R**T**VL**Q**T**FE**L**E**G**Y**Q**IP**K**G**S**W**Y**MS**I**R**D**T**H**ET**S**SV**Y**Q**N**-P**D**L  
MmCyp26C1 341 ---SG**S**PP**D**C-G**E**PD**L**S**L**AM**L**GR**L**RY**Y**DC**V**VE**V**L**R**LL**PP**VS**GG**Y**R**T**AL**R**T**FE**L**D**G**Y**Q**IP**K**G**S**W**Y**MS**I**R**D**T**H**ET**A**AV**Y**RS**P**PE**G**  
PmCyp26B1/C1b 419 PA**E**E**G**N**L**VER**M**K**V**-----A**A**GE**A**E**E**GD**A**RE**D**G**CR**KE**PT**L**GP**ER**L**SR**L**RY**L**DC**V**VE**V**L**R**ML**PP**VS**GG**Y**R**T**AL**R**T**FE**L**D**G**F**Q**IP**K**G**S**W**Y**MS**I**R**D**T**H**D**T**AP**V**FP**D**-P**E**H  
EbCyp26\_10538 353 R-----D**E**RP**EC**MG**CG**AR**L**SL**E**Q**L**GL**S**Y**L**DC**V**VE**V**L**R**LL**PP**VS**GG**Y**R**T**AL**Q**T**FE**I**D**G**Y**Q**IP**K**G**S**W**Y**MS**I**R**D**T**H**D**T**AP**Q**FA**R**-P**E**R  
Eb

**Supplementary Figure 1: Vertebrate Cyp26 protein alignments.** Protein alignments of vertebrate Cyp26A1 and vertebrate Cyp26B1/C1. The yellow highlighting represents the identity between sequences with a 95% threshold for sequence identity. Conserved K, I helices and Heme domains are indicated. Cutting sites of the gRNAs used for the CRISPR/Cas9 experiments are indicated with a teal arrow. Cc, *Carcharodon carcharias*; Eb, *Eptatretus burgeri*; Lc, *Latimeria chalumnae*; Mm, *Mus musculus*; Pm, *Petromyzon marinus*; Rt, *Rhincodon typus*.



## Vertebrate Aldh1a1 and Aldh1a2

|               |     |                                                                                                                  |
|---------------|-----|------------------------------------------------------------------------------------------------------------------|
| PmAldh1a1/a2b | 1   | MA-----QRGD-----GVGRVGEAGGGPIPTVPADPMQMYTQLFINNEWQEAASGRKFDVTNPSTGQLLCSVAEADEEDVDRAVRAARAARLGLSPWRRMDPSARGRLLA   |
| EbAldh1a1     | 1   | MSEVASRTDGVL-----SNAFDGLSISPPSPVMDLQIKYTKIFINNSWHDLSNGDTFTPTVDPNSGCKLCDVQEGREVDVAVKAAREAFRPGSPWRRLDASERGRLLN     |
| PmAldh1a1/a2a | 1   | -MSGGAEPVGGDAAQAGLAGLLASLPGVPPSPVRDLARYTKIFIGNEWDRDISGRFTPTFDPASGEKLCDVQEGDHEDVNVAVVAAREAFVLGLSPWRRMDASDRGVLLS   |
| RtAldh1a2     | 1   | MTSSEIEIPSEVKT--DPAA-LIASLQLLPSPTPNLEIQHTKLFINNEWHHSVSCKTFSTYNPSTGEKICDVQEAADKADVDKAVQAARIAFSPGVSWRRMDASERGRLLD  |
| LoAldh1a2     | 1   | MTSSKIELPGEVKT--DPAA-LVASLHLVPSVPNLEIKHTKIFINNEWQNSVSGKTFPTYNPSNGEKICDVQEAADKADVDKAVQAARLAFSLGSVWRIMDASERGRLLD   |
| LcAldh1a2     | 1   | MTSSKIELPGEVKT--DPAA-LMASLHLLPSPTPNLEIKHTKIFINNEWQNSVSGKTFPVYNPSNGEKICDVQEAADKADVDKAVQAARLAFSLGSVWRIMDASERGRLLN  |
| MmAldh1a2     | 1   | MTSSEIAMPGEVKA--DPAA-LMASLQLLPSPTPNLEIKYTKIFINNEWQNSVSGRVFPVCNPATGEQVCEVQEAADKVDIDKAVQAARLAFSLGSVWRIMDASERGRLLD  |
| MmAldh1a1     | 1   | -----M-SSPAQPAVPAPLADLKIQTHTKIFINNEWHNSVSCKTFPVLPNATPEEIVCHVEGDKADVDKAVKAARQAQFQIGSPWRRMDASERGRLLN               |
| RtAldh1a1     | 1   | MS----A----PAA--DDES-PAPAPRYVPAPLTELQIKYTKIFINNEWHNSVSCKFTTYPNATGEKICDIEEGDKVEVDKAVKAAREAFQIGSTWRRMDASERGRLLH    |
| LcAldh1a1     | 1   | MS----ATPCESQN--SDLK-PAVVPGLPVVPSNLEIKYTKIFINNDWHDSSNGKRFPTYPNATGEKICEVEGDKVEDVDKAVKAAREAFQLGSLWRITMDASERGRLLN   |
| PmAldh1a1/a2b | 101 | RLADLVERDRALLSTLECLDAGKPFLLTTYFVDLDGVIRTLRYAGWADKVGQRTIPVDGDFISYTRHEPIGVCGQIIPWNFPLLMFAWKIPALCCGNTVVVKPAEQTPL    |
| EbAldh1a1     | 105 | RLAELVERDVTLSTLESLSGKPFLLHTFFVDMGIVKTLRYAGWCDKVQGRITIPVDGEYFTYTRHEPIGVCGQIIPWNFPLLMFVWIKIPALCCGNTIVIKPAEQTPL     |
| PmAldh1a1/a2a | 110 | RLADLVERERTTLATLESMDSGKPFLLPAFFVDVTVGAVKTLRYFAGWCDKIQGRITIPVDGEYFTYTRHEPIGVCGQIIPWNFPLLMFIWKIPALCCGNTVVVKPAEQTPL |
| RtAldh1a2     | 108 | KLADLVERDRALATLESLSGKPFLLQAYYVDLQGVIKTLRYFAGWTDKIHGKTIPTVDGDFYFTTRHEPIGVCGQIIPWNFPLLMFAWKIPALCCGNTVVIKPAEQTPL    |
| LoAldh1a2     | 108 | KLANLVERDRVLLATLESLSGKPFLLQAYYVDLQGTIKTLRYFAGWADKIHGMITIPMDGDFYFTTRNEPIGVCGQIIPWNFPLLMFAWKIPALCCGNTVVVKPAEQTPL   |
| LcAldh1a2     | 108 | KLADLVERDSTLLATMESLNGGKPFLLQAFYVDLQGVIKTLRYFAGWADKIHGMITIPVDGDFYFTTRHEPIGVCGQIIPWNFPLLMFAWKIPALCCGNTVVVKPAEQTPL  |
| MmAldh1a2     | 108 | KLADLVERDRATLATMESLNGGKPFLLQAFYIDLQGVIKTLRYAGWADKIHGMITIPVDGDFYFTTRHEPIGVCGQIIPWNFPLLMFTWKIPALCCGNTVVVKPAEQTPL   |
| MmAldh1a1     | 91  | KLADLVERDRLLLATMEALNGGKVFANAYLSDLGGSIKALKYKAGWADKIHGQITPSDGDIFTYTRHEPIGVCGQIIPWNFPLLMFTWKIPALCCGNTVVVKPAEQTPL    |
| RtAldh1a1     | 100 | KLADLVERDRVILSTIESIDSGKFLHAYFVDLDGSIKTLRYAGWADKIQGRITIPVDGDFYFTTRHEPIGVCGQIIPWNFPLLMFTWKIPALCCGNTVVVKPAEQTPL     |
| LcAldh1a1     | 104 | KLADLVERDQMLSTIESVDSGKPFLLSAYTIDLTAITKTLRYAGWTDKIQGRITIPVDGDFYFTTRHEPIGVCGQIIPWNFPLLMFTWKIPALCCGNTVVVKPAEQTPL    |
| PmAldh1a1/a2b | 211 | SALHVCSLILEAGFPPGVVNIIPGFGPTAGAAIARHVDVDKVAFTGSTEVGKLIQQAASASNLKRVTLLEGGKSPNIIIFADADLDLAVEQAHQGSFNNQGCCCTAGSRVF  |
| EbAldh1a1     | 215 | TALHMGALIKEAGFPAGVNIIPGVGPTAGAAIARHPDINKVSFTGSTEVGKLIQEAAGKSNLKRVTLELGGKSPNIIIFVPDADLDVAVKETHEAVFFNQGCCCTAGSRVF  |
| PmAldh1a1/a2a | 220 | TALHVGALIAEAGFPPGVVNIIPGFGPTAGAAIVQHPDIDKIAFTGSTEVGKLIQEAAGKSNLKRVTLELGGKSPNIIIFADADLDAAVEQAHQGVFFNQGCCCTAGSRVF  |
| RtAldh1a2     | 218 | TALYMGALITEAGFPPGVVNIIPGFGPTAGAAIASHMDIDKIAFTGSTEVGKLIQEAAGKSNLKRVTLELGGKSPNIIIFADADLDYAVEQAHQGVFFNQGCCCTAGSRVF  |
| LoAldh1a2     | 218 | SCLYMGALIKEAGFPPGVVNIIPGFGPTAGAAIANHMGIDKIAFTGSTEVGKLIQEAAGKSNLKRVTLELGGKSPNIIIFADADLDYAVEQAHQGVFFNQGCCCTAGSRVF  |
| LcAldh1a2     | 218 | SALYMGALIKEAGFPPGVVNIIPGVGPTAGATAIAAHMGIDKIAFTGSTEVGKLIQEAAGKSNLKRVTLELGGKSPNIIIFADADLDYAVEQAHQGVFFNQGCCCTAGSRVF |
| MmAldh1a2     | 218 | SALYMGALIKEAGFPPGVVNIIPGVGPTAGAAIASHMDIDKIAFTGSTEVGKLIQEAAGKSNLKRVTLELGGKSPNIIIFADADLDYAVEQAHQGVFFNQGCCCTAGSRVF  |
| MmAldh1a1     | 201 | TALHLSALIKEAGFPPGVVNIIPGVGPTAGAAISSHMDVDKVAFTGSTQVGLKIEAAGKSNLKRVTLELGGKSPNIIIFADADLDYAVEFAHHGVFYHQGCCVAAASRIF   |
| RtAldh1a1     | 210 | TALYMGALVKEAGFPPGVVNIIPGVGPTAGATITSHMDIDKIAFTGSTEVGKLIQEAAGKSNLKRVTLELGGKSPNIIIFADADLDYAVEQAHHALFFHQGCCCLAGSRIF  |
| LcAldh1a1     | 214 | TALYLGAALIKEAGFPPGVVNIIPGFGPTAGAAISQHMDIDKIAFTGSTEVGKLIQQAAGKSNLKRVTLELGGKSPNIIIFADADLDYAVEQAHHALFFHQGCCCLAGSRIF |
| PmAldh1a1/a2b | 321 | VQAPVYDEFVRRTERARRRALGDPLRPGTDQGPQVDQTFQDKVLELVESGKTEGAHVACGGGADTVAGALFIQPTVFTDVQDHMRITVEEIFGPVQIMILKFDVTVEEVL   |
| EbAldh1a1     | 325 | VHESIYRDFVRRSVECARRRRLGNPLHPSTQQGPQIDETQRKRIELIESGVRREGARLECGGCTWGD-QGYFLEPTVFSVDVDDMRIACEEIFGPVQQIMSFTSSEVLA    |
| PmAldh1a1/a2a | 330 | VEDPVYDEFVRRSAQRARRRRVGHFPCPSTEHGPDIDEKQSKLIELVQSALEEGAHLECGGVACEG-RGYFVQPTVFSVDVPSDARIITREEIFGPVQILMRFDLSLEDDVA |
| RtAldh1a2     | 328 | VEEPIYDEFVRKSTERAQRRVTGNPFDPAITEQGPDIDKQCKVLLEVLVSGIAEGAKLECGGKSLGK-KGFFIEPTVFSNVTDMDRIAKEEIFGPVQIILKFKTMEEV     |
| LoAldh1a2     | 328 | VEEPVYEEFVRKSVERAKRRVGSFPDPTTEQGPDISKEQSQSILELIQSGISEGAKLECGGKAIGR-KGYFIEPTVFSNVDRDEMIRIAKEEIFGPVQIIMKFKSIDEVIE  |
| LcAldh1a2     | 328 | VEEPIYEEFVRRSIERAKRRIVGSPFDPTTEQGPDINKEQYNNKILGLIQSGISEGAKLECGGKALGQ-KGFFIEPTVFSNVTDMDRIAKEEIFGPVQIIMKFKSTEEVIE  |
| MmAldh1a2     | 328 | VEESIYEEFVRKSVERAKRRIVGSPFDPTTEQGPDIDKQYNNKVLIELIQSGVAEGAKLECGGKGLGR-KGFFIEPTVFSNVTDMDRIAKEEIFGPVQIILKFKTMEEVIE  |
| MmAldh1a1     | 311 | VEESVYDEFVRKSVERAKKYVLGNPLTPGINQGPQIDKEQHKDILDLIESGKKEGAKLECGGRWGN-KGFFVQPTVFSNVTDMDRIAKEEIFGPVQIIMKFKSVDDVIK    |
| RtAldh1a1     | 320 | VEEPVYEFVCKSISLAQKHVIGNPLHEAVTHGPDIDKEQYDKILNLIESGKKEGAKLECGGLPWGD-KGFFIQPTVFSVTDMDRIAKEEIFGPVQIIMKFKTMEDEVIE    |
| LcAldh1a1     | 324 | VEESIYEEFVHKSVEQAQRRLGNPLIPGVDQGPQINQYHKDILDLIESGKKEGAKLECGGTSWGD-KGFFIQPTVFSVDVDDMDRIAKEEIFGPVQIIMKFKTIDEVIE    |
| PmAldh1a1/a2b | 431 | RANNTRYGLAAAVFTRDLDTALTAAAGLQAGTVVWNCYNVIAQATFAGGFKMSGNGREMGEYGLQYETVKTVTIRVPKKS                                 |
| EbAldh1a1     | 434 | RANDSYGLAAGVFSKDLDTVLHVAALQAGTVVWNCYNVAVNCQSPFGGFKMSGNGREMGEYGLQYETVKTVTIRLPNKML                                 |
| PmAldh1a1/a2a | 439 | RANASPYGLVAVFTRDLERALAVSAAMQAGTVWNCYNVAMNAQSPFGGFKMSGNGREMGEYGLQYETVKTVTIKISQKNS                                 |
| RtAldh1a2     | 437 | RANKSQFGLVAAVFTKDIDKALTVAAMQAGTVWNCYNVAVNCQSPFGGFKMSGNGREMGEYGLREYETIKTIVTRIQKNS                                 |
| LoAldh1a2     | 437 | RANNSEYGLTAGVFTRDINKAMTVSTAMQAGTVWNCYNFALSAQCPFGGFKMSGNGREMGEYGLREYSEVKTTITIKVPQKNS                              |
| LcAldh1a2     | 437 | RANNPDFGLVAAVFTNDLNKALTVAAMQAGTVWNCYNVAVNCQSPFGGFKMSGNGREMGEYGLREYSEVKTTITIKVPQKNS                               |
| MmAldh1a2     | 437 | RANNPDFGLVAAVFTNDINKALMVSSAMQAGTVWNCYNVAVNCQSPFGGFKMSGNGREMGEYGLREYSEVKTTITIKVPQKNS                              |
| MmAldh1a1     | 420 | RANNTTYGLAAGLFTKDLKAITVSSALQAGVWVWNCYMLSAQCPFGGFKMSGNGRELGHEGLYETELKTVAMKISQKNS                                  |
| RtAldh1a1     | 429 | RANNTHYGLVAAVFTKDLINKAFTVASALQAGTVVWNCYNAMHVQSPFGGFKMSGNGREMGEYGLQYETIKTITIKIPQKNS                               |
| LcAldh1a1     | 433 | RANNTHYGLVAGVFTKDLNKAMTIASSLQGTGVWNCYNAMTPQCPFGGFKMSGNGREMGEYGLQYETIKTITIKISQKNS                                 |

**Supplementary Figure 2: Vertebrate Aldh1a protein alignments.** Protein alignments of sea lamprey (Pm) Aldh1a1/a2a and Aldh1a1/a2b with Aldh1a1 and Aldh1a2 from various jawed vertebrates. The yellow highlighting represents the identity between sequences with a 95% identity threshold. Conserved Glutamic acid (Glu) and Cysteine (Cys) domains are indicated. Cutting sites of the gRNAs used for the CRISPR/Cas9 experiments are indicated with a blue arrow. Eb, *Eptatretus burgeri*; Lc, *Latimeria chalumnae*; Lo *Lepisosteus oculatus*; Mm, *Mus musculus*; Pm, *Petromyzon marinus*; Rt, *Rhincodon typus*.

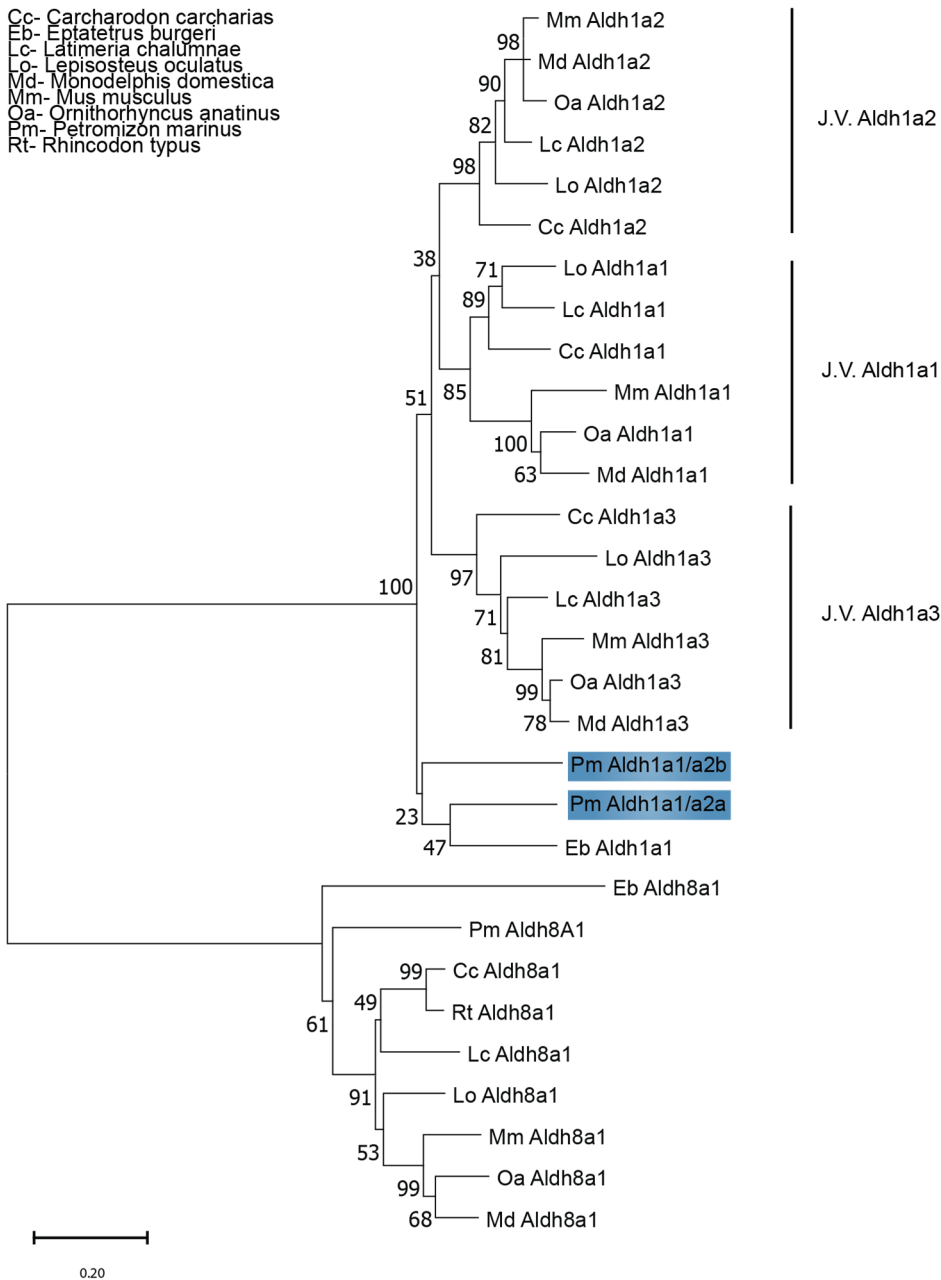

**Supplementary Figure 3: Vertebrate *Aldh1a* Phylogeny.** Phylogenetic analysis of the vertebrate *Aldh1a* complement with *Aldh1a8* used as an outgroup. Jawed Vertebrate (J.V.) *Aldh1a1/Aldh1a2/Aldh1a3* clades are indicated with black lines. Trees were generated by Maximum Likelihood using the WAG model with 500 iterations for bootstrap testing, and the resulting supporting value for each node is shown as a percentage. A scale bar for the evolutionary distance is indicated below each tree. Species name abbreviations are indicated on the top left of the panel.

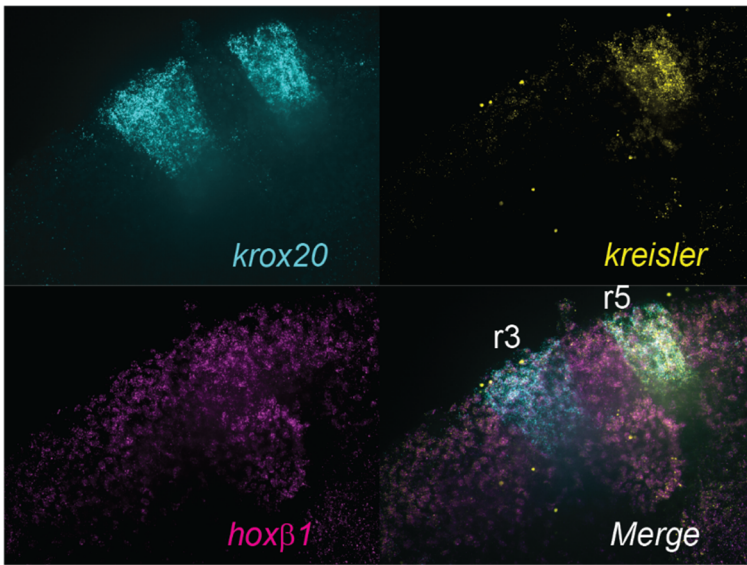

**Supplementary Figure 4: HCRv3 development and validation in the sea lamprey.** HCR panel representing a high-power (40X) image of *krox20* (cyan), *kreisler* (yellow) and *hoxβ1* (magenta) with their merged expression. This image was obtained after optimizing and adapting our HCRv3 protocol to be able to visualize hindbrain segments. We then used this protocol with this combination of genes to understand the changes in hindbrain segmentation in Talarazole vs. DMSO embryos (**Fig. 6a**).

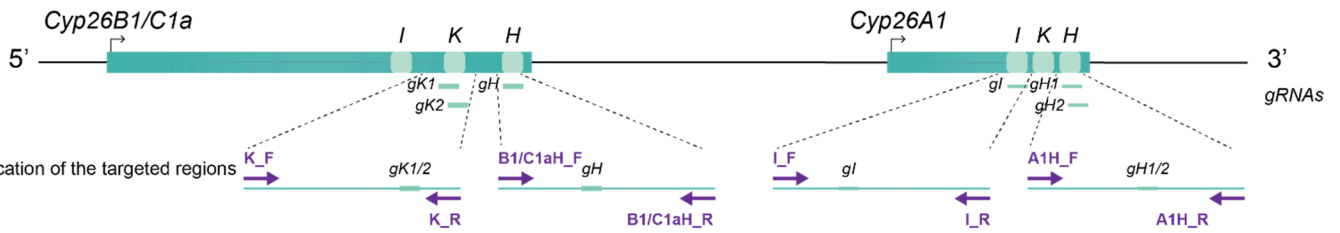

|                 |                                                              |     |
|-----------------|--------------------------------------------------------------|-----|
| <b>Ctrl_C1H</b> | GGAGCGTCCTCTACAGCATCCGCGACACGCACGAGACGGCGCCGGCCTTCAGCTCGCCGC | 60  |
| <b>Cr_C1H_1</b> | GGAGCGTCCTCTACAGCATCCGCGACACGCACGAGACGGCGCCGGCCTTCAGCTCGCCGC | 60  |
| <b>Cr_C1H_2</b> | GGAGCGTCCTGTACAGCATCCGCGACACGCACGAGACGGCGCCGGCCTTCAGCTCGCCGC | 60  |
| <b>Cr_C1H_3</b> | GGAGCGTCCTATACAGCATCCGCGACACGCACGAGACGGCGCCGGCCTTCAGCTCGCCGC | 60  |
| <b>Cr_C1H_4</b> | GGAGCGTCCTCTACAGCATCCGCGACACGCACGAGACGGCGCCGGCCTTCAGCTCGCCGC | 60  |
| <b>Cr_C1H_5</b> | GGAGCGTCCTCTACAGCATCCGCGACACGCACGAGACGGCGCCGGCCTTCAGCTCGCCGC | 60  |
| *****           |                                                              |     |
| <b>Ctrl_C1H</b> | TTGACTTCGACCCCGACCGCTTCGACGCGACGCGCGCCGAGGACTCGAAGGAGCGCTTCA | 120 |
| <b>Cr_C1H_1</b> | TTGACTTCGACCCCGACCGCTTAGACGCGACGCGCGCCGAGGACTCGAAGGAGCGCTTCA | 120 |
| <b>Cr_C1H_2</b> | TTGACTTCGACCCCGACCGCTTCGACGCGACGCGCGCCGAGGACTCGAAGGAGCGCTTCA | 120 |
| <b>Cr_C1H_3</b> | TTGACTTCGACCCCGACCGCTTCGACGCGACGCGCGCCGAGGACTCGAAGGAGCGCTTCA | 120 |
| <b>Cr_C1H_4</b> | TTGACTTCGACCCCGACCGCTTCGACGCGACGCGCGCCGAGGACTCGAAGGAGCGCTTCA | 120 |
| <b>Cr_C1H_5</b> | TTGACTTCGACCCCGACCGCTTCG-----                                | 69  |
| *****           |                                                              |     |
| <b>Ctrl_C1H</b> | GCTACCTGCCGTTTCGGCGGCGGTGCGCAGCTGCCTGGGCAAGGAGCTCGCCAAGCTCA  | 180 |
| <b>Cr_C1H_1</b> | GCTACCTGCC----GGCGGCGGTGCGCAGCTGCCTGGGCAAGGAGCTCGCCAAGCTCA   | 176 |
| <b>Cr_C1H_2</b> | GCTACCTGCC----CGGCGGCGGTGCGCAGCTGCCTGGGCAAGGAGCTCGCCAAGCTCA  | 176 |
| <b>Cr_C1H_3</b> | GCTACCTGCC----CGGCGGCGGTGCGCAGCTGCCTGGGCAAGGAGCTCGCCAAGCTCA  | 176 |
| <b>Cr_C1H_4</b> | GCTACCTGCC----GGCGGCGGTGCGCAGCTGCCTGGGCAAGGAGCTCGCCAAGCTCA   | 176 |
| <b>Cr_C1H_5</b> | -----CGGCGGCGGTGCGCAGCTGCCTGGGCAAGGAGCTCGCCAAGCTCA           | 129 |
| *****           |                                                              |     |
| <b>Ctrl_A1H</b> | CCCGACCGCTGGATGACCGGCGGCGACGCCGGCGGCGGCAACGAGACGCGGCATCGTCG  | 120 |
| <b>Cr_A1H_1</b> | CCCGACCGCTGGATGACCGGCGGCGACGCCGGCGGCGGCAACGAGACGCGGCATCGTC-  | 119 |
| <b>Cr_A1H_2</b> | CCCGACCGCTGGATGACCGGCGGCGACGCCGGCGGCGGCAACGAGACGCGGCATCGTCG  | 120 |
| <b>Cr_A1H_3</b> | CCCGCCCGCGGGATGACCGGCGGCGGCGCTGCGGCGGCATCGGAGACGTGGCATTGTCTG | 120 |
| <b>Cr_A1H_4</b> | CCCGACCGCTGGATGACCGGCGGCGACGCCGGCGGCGGCAACGAGACGCGGCATCGTC-  | 119 |
| *** **          |                                                              |     |
| <b>Ctrl_A1H</b> | CGCTTCACCTACATCCCGGGGGCGGCTCGCGCAGCTGCGTGGGCAAGGAGCTGGCGCGAC | 180 |
| <b>Cr_A1H_1</b> | -----GCGCAGCTGCGTGGGCAAGGAGCTGGCGCGAC                        | 151 |
| <b>Cr_A1H_2</b> | CGCTTCACCTCG-----CGCTGCGTGGGCAAGGAGCTGGCGCGAC                | 160 |
| <b>Cr_A1H_3</b> | CGCGTCTC-----CTCCGCTGCGTGGGCAAGGAGCTGGCGCGAC                 | 160 |
| <b>Cr_A1H_4</b> | -----GCGCAGCTGCGTGGGCAAGGAGCTGGCGCGAC                        | 151 |
| *****           |                                                              |     |
| <b>Ctrl_A1H</b> | TCATCCTGAGGATCGTGGTGGTGGAGCTGTGCCGCGCTGCGAGTGGGAGCTGCCCAACG  | 240 |
| <b>Cr_A1H_1</b> | TCATCCTGAGGATCGTGGTGGTGGAGCTGTGCCGCGCTGCGAGTGGGAGCTGCCCAACG  | 211 |
| <b>Cr_A1H_2</b> | TCATCCTGAGGATCGTGGTGGTGGAGCTGTGCCGCGCTGCGAGTGGGAGCTGCCCAACG  | 220 |
| <b>Cr_A1H_3</b> | TCATCCTGAGGATCGTGGTGGTGGAGCTGTGCCGCGCTGCGAGTGGGAGCTGCCCAACG  | 220 |
| <b>Cr_A1H_4</b> | TCATCCTGAGGATCGTGGTGGTGGAGCTGTGCCGCGCTGCGAGTGGGAGCTGCCCAACG  | 211 |
| *****           |                                                              |     |
| <b>Ctrl_A1I</b> | CCGCTCACCCTCCCGCCCCCTCCAGGACCTGAAGGAGTCGCCACGGAGCTCCTGTTCG   | 420 |
| <b>Cr_A1I</b>   | CCGCTCACCCTCCCGCCCCCTCCAGGACCTGAAGGAGTCGCCACGGAGCTCCTGT--G   | 419 |
| *****           |                                                              |     |
| <b>Ctrl_A1I</b> | GGGACACGAGACGACGCCAGCGCCGCCACGTCACTCGTCATGCACCTGGCAATCCACC   | 480 |
| <b>Cr_A1I</b>   | GGGACACGAGACGACGCCAGCGCCGCCACGTCACTCGTCATGCACCTGGCAATCCACC   | 478 |
| *****           |                                                              |     |

|                     | Cyp26A1_H | Cyp26A1_I | Cyp26B1/C1a_H |
|---------------------|-----------|-----------|---------------|
| Mutant CRISPR loci  | 4/7       | 1/12      | 5/6           |
| Control CRISPR loci | 5/5       | 6/6       | 3/3           |

**Supplementary Figure 5: Genotyping strategy and sequencing results for *Cyp26* CRISPR embryos**

Cartoon illustrating the design of primers for amplifying each site targeted by the *gRNAs* in the *Cyp26* loci. The primer binding sites are indicated in bold purple. For each site, we show an alignment of mutant loci (Cr\_) sequences with the sequence of a control locus (Ctrl), the site targeted by the gRNA is indicated in bold and the PAM in red. A table indicating the proportion of mutant CRISPR or control CRISPR loci for each site is shown.



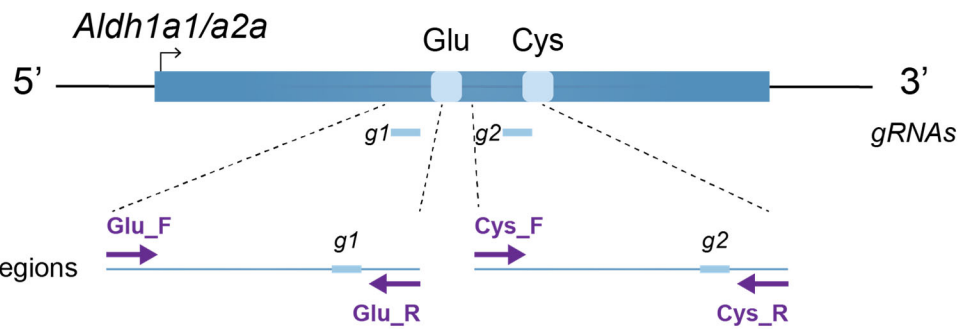

```

Ctrl_Glu      CCCTTACGTAACGCAGGTGGGGAAAGTTGATCCAGGAGGAGGCCGGCAAGAGTAACCTGAA 179
Cr_Glu_1      CCTTTACGTAACGCAGGTGGGGAAAGTTGATCCAGGA-----GTAACGTGAA 73
Cr_Glu_2      CCCTTACGTAACGCAGGTGGGGAAAGTTGATCCAGGA-----GTAACCTGAA 165
Cr_Glu_3      CCCTTACGTAACGCAGGTGGGGAAAGTTGATCCAGGA-----GTAACCTGAA 166
Cr_Glu_4      CCCTTACGTAACGCAGGTGGGGAAAGTTGATCCAGGAGTAACCTGAAGC----- 165
Cr_Glu_5      CCCTTACGTAACGCAGGTGGGGAAAGTTGATCCAGGA-----GTAACCTGAA 165
** *****

Ctrl_Glu      GCGCGTGACGCTGGAGCTTGGCGGGAAGAGCCCCATCATCGTCTTCGCCGACGCCGACCG 239
Cr_Glu_1      GCGAGTGACGCTGAAGCTTGGCGGGAAGAGCCCCATCATCGTATTTCGCCGAA-CCGACCG 132
Cr_Glu_2      GCGCGTGACGCTGGAGCTTGGCGGGAAGAGCCCCATCATCGTCTTCGCCGACGCCGACCG 225
Cr_Glu_3      GCGCGTGACGCTGGAGCTTGGCGGGAAGAGCCCCATCATCGTCTTCGCCGACGCCGACCG 226
Cr_Glu_4      ---GCGGACGCTGGAGCGTGGCGGGAAGAGCCCCATCATCGTTTTGACCGACGCCGACCG 222
Cr_Glu_5      GCGCGTGACGCTGGAGCTTGGCGGGAAGAGCCCCATCATCGTCTTCGCCGACGCCGACCG 225
***** ** *****

Ctrl_Cys      CCCCTGCTGTGACACTGCTGACTCGGCGTGGTTCCACCCCTCCACCCCCCCTCCAC 240
Cr_Cys_1      CCCCTGCTGTGACACTGCTGACTCGGCGTGGTTCCACCCCTCCACCCCCCCTCCAC 240
Cr_Cys_2      CCCCTGCTGTGACACTGCTGACTCGGCGTGGTTCCACCCCTCCACCCCCCCTCCAC 240
Cr_Cys_3      CCCCTGCTGTGACACTGCTGACTCGGCGTGGTTCCACCCCTCCACCCCCCCTCCAC 240
Cr_Cys_4      CCCCTGCTGTGACACTGCTGACTCGGCGTGGTTCCACCCCTCCACCCCCCCTCCAC 238
Cr_Cys_5      CCCCTGCTGTGACACTGCTGACTCGGCGTGGTTCCACCCCTCCACCC----- 238
Cr_Cys_6      CCCCTGCTGTGACACTGCTGACTCGGCGTGGTTCCACCCCTCCACCC----- 238
Cr_Cys_7      CCCCTGCTGTGACACTGCTGACTCGGCGTGGTTCCACCCCTCCACCC----- 240
*****

Ctrl_Cys      TACGAGCAGTGGACGCGCGGTGGAGCAGGCGCACCAGGGGGTGTCTTGGAACCAGGGCC 300
Cr_Cys_1      -----GGGCC 258
Cr_Cys_2      -----GGGCC 258
Cr_Cys_3      -----GGGCC 249
Cr_Cys_4      -----GGGCC 260
Cr_Cys_5      -----AGGGCC 250
Cr_Cys_6      -----AGGGCC 250
Cr_Cys_7      -----AGGGCC 244
*****

```

|                     | Aldh1a1/a2a_Glu | Aldh1a1/a2a_Cys |
|---------------------|-----------------|-----------------|
| Mutant CRISPR loci  | 5/5             | 7/11            |
| Control CRISPR loci | 5/5             | 3/3             |

**Supplementary Figure 6: Genotyping strategy and sequencing results for *Aldh1a1/a2a* CRISPR embryos.**

Cartoon illustrating the design of primers for amplifying each site targeted by the *gRNAs* in the *Aldh1a1/a2a* gene loci. Primer binding sites are indicated in bold purple. For each site, we show an alignment of mutant loci (Cr\_) sequences with the sequence of a control locus (Ctrl), the site targeted by the *gRNA* is indicated in bold and the PAM in red. A table indicating the proportion of mutant CRISPR or control CRISPR loci for each site is shown.

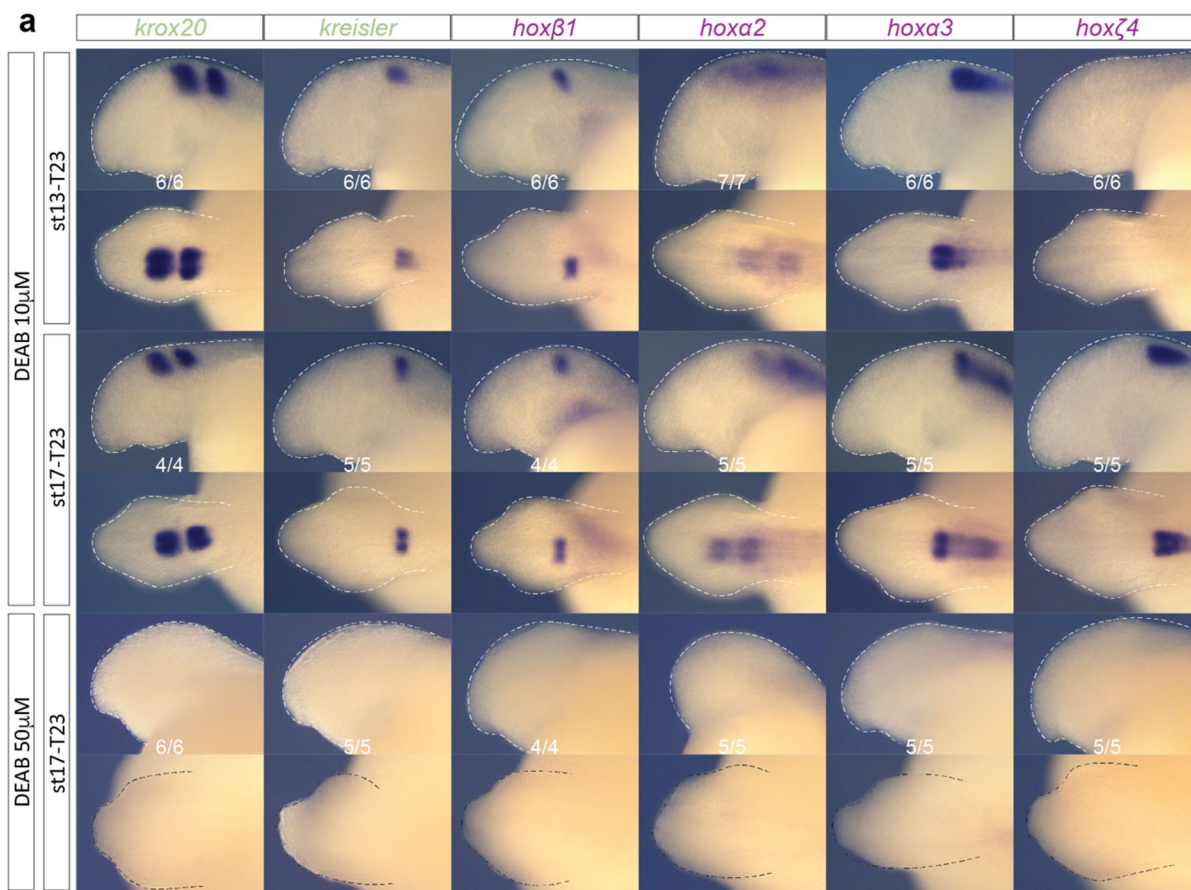

**b** Summary of gene expression

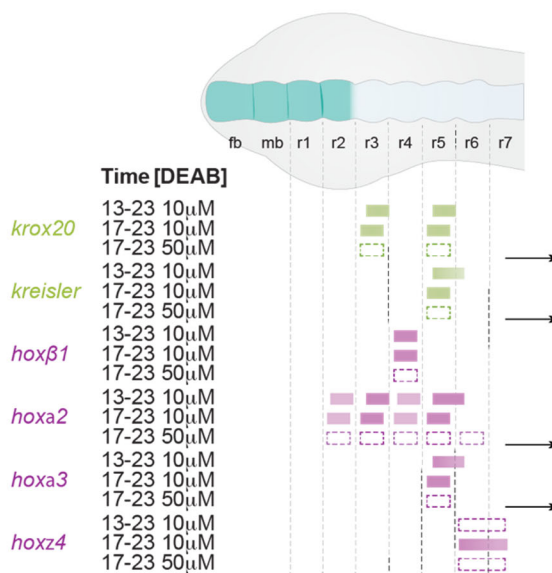

**Supplementary Figure 7: Effect of DEAB concentration and timing of treatment on hindbrain patterning. (a)** cISH of key patterning hindbrain markers in embryos treated with 10 μM of DEAB at gastrulation (st13), 10 μM of DEAB at early neurulation (st17) or 50 μM of DEAB at early neurulation (st17). For each gene, the most representative phenotype is shown, and numbers of experimental replicates are indicated. These molecular phenotypes obtained for embryos treated with 10 μM of DEAB at gastrulation (st13) are less severe than the ones obtained when treating the embryos with 50 μM DEAB (**Fig. 5d**) and are reminiscent of the phenotypes obtained in the *Cr Aldh1a1/a2a* mutants (**Fig. 8c**). **(b)** Cartoon summarizing the effects of different concentrations and timing of treatments on hindbrain patterning.

Mouse (*Mus musculus*): Aldh1a1: NP\_001348432.1; Aldh1a2: NP\_033048.2; Aldh8a1: NP\_848828.1; Cyp26A1: XP\_017173542.1; Cyp26B1: NP\_001171184.1; Cyp26C1: XP\_017173748.1; Cyp51: NP\_064394.2

Spotted gar (*Lepisosteus oculatus*): Aldh1a1: XP\_015222024.1; Aldh1a2: XP\_006628784.1; Aldh8a1: XP\_006625886.1; Cyp26A1-LG5: XP\_015202021.1; Cyp26B1-LG5: XP\_015202022.1; Cyp26B1-LG4: XP\_006629157.1; Cyp51: XP\_006636075.1

West indian coelacanth (*Latimeria chalumnae*): Aldh1a1: XP\_006001725.2; Aldh1a2: XP\_005998797.2; Aldh8a1: XP\_014352052.1; Cyp26A1: XP\_005991616.1; Cyp26B1: XP\_005997719.1; Cyp26C1: XP\_014341348.1; Cyp51: XP\_014350652.1

Whale shark (*Rhincodon typus*): Aldh1a1-like: XP\_015222024.1; Aldh1a2: XP\_020369553.1; Aldh8a1: XP\_048452951.1; Cyp26A1: XP\_020382659.1; Cyp26B1: XP\_020378695.1; Cyp26C1: XP\_020367038.1; Cyp51: XP\_020371022.1

Inshore hagfish (*Eptatretus burgeri*): Aldh1a1: ENSEBUG00000010361; Aldh8a1: ENSEBUG00000011145; Cyp26C1 (10538): ENSEBUG00000010538; Cyp26C1 (06909): ENSEBUG00000006909; Cyp51: ENSEBUG00000006843

Sea lamprey (*Petromyzon marinus*): Aldh1a1/a2a (Chr1): XP\_032805864.1; Aldh1a1/a2b (Ch40): XP\_032824682.1; Aldh8a1: XP\_032810842.1; Cyp26A1: XP\_032808019.1-2; Cyp26B1/C1a (Chr11): XP\_032808017.1; Cyp26B1/C1b (Chr9): XP\_032806163.1; Cyp51: XP\_032816590.1

Thorny Skate (*Amblyraja radiata*): Aldh1a1-like: XP\_032873441.1; Aldh1a2: XP\_032906516.1; Cyp26A1: XP\_032889480.1; Cyp26B1: XP\_032885953.1; Cyp26C1: XP\_032889482.1;

Chicken (*Gallus gallus*): Aldh1a1: NP\_989908.2; Aldh1a2: NP\_001384737.1; Cyp26A1: NP\_001001129.2; Cyp26B1: XP\_015141554.1; Cyp26C1: XP\_421678.6;

Chinese soft-shelled turtle (*Pelodiscus sinensis*): Aldh1a1: XP\_006137885.1; Aldh1a2: XP\_006112531.1; Cyp26A1: XP\_006113245.1; Cyp26B1: XP\_025042348.1; Cyp26C1: XP\_025035575.1;

West African lungfish (*Protopterus annectens*): Aldh1a1: XP\_043916765.1; Aldh1a2: XP\_043934839.1; Cyp26A1: XP\_043912621.1; Cyp26B1: XP\_043919907.1; Cyp26C1: XP\_043912622.1;

Reedfish (*Erpetoichthys calabaricus*): Aldh1a1: XP\_028658993.1; Aldh1a2: XP\_028678887.1; Cyp26A1: XP\_028651199.1; Cyp26B1: XP\_028657295.1; Cyp26C1: XP\_028651196.1

Amphioxus (*Branchiostoma floridae*): BfAldh1a1/a2a: XP\_035683184.1; BfAldh1a1/a2b: XP\_035666435.1; BfAldh1a1/a2c: XP\_035683791.1; BfAldh1a1/a2d: XP\_035683789.1; BfAldh1a1/a2e: XP\_035659507.1; BfAldh1a1/a2f: XP\_035659462.1; BfCyp26-1: LOC118413434; BfCyp26-2: XP\_035672703.1; BfCyp26-3: XP\_035672700.1;

**Supplementary Figure 8: Protein accession numbers used for phylogeny analysis.** Protein sequences corresponding to each gene were retrieved using both ENSEMBL and NCBI databases, focusing on the latest available version of the genome and/or the most complete available genome annotation. Amphioxus *Cyp26* and *Aldh1* gene families were used as outgroups for the analyses of *Cyp26* and *Aldh1a* complements.

Mouse (*Mus musculus*): *Aldh1a1*: NM\_001361503.1; *Aldh1a2*: NM\_009022.4;  
*Cyp26A1*: XM\_017318053.2; *Cyp26B1*: NM\_001177713.1; *Cyp26C1*: XM\_017318259.3  
  
 Grey short-tailed opossum (*Monodelphis domestica*): *Aldh1a1*: XM\_001373091.4;  
*Aldh1a2*: XM\_007479682.2; *Cyp26A1*: XM\_001375255.4; *Cyp26C1*: XM\_007478798.1  
  
 Platypus (*Ornithorhynchus anatinus*): *Aldh1a1*: XM\_007667019.3;  
*Aldh1a2*: XM\_029070050.1; *Cyp26B1*: XM\_029046562.2; *Cyp26C1*: XM\_029060242.1  
  
 Chicken (*Gallus gallus*): *Aldh1a1*: NM\_204577.5; *Aldh1a2*: NM\_001397808.1;  
*Cyp26A1*: XM\_015288598.4; *Cyp26B1*: XM\_015286068.4; *Cyp26C1*: XM\_421678.8  
  
 Spotted gar (*Lepisosteus oculatus*): *Aldh1a1*: XM\_015366538.1; *Aldh1a2*: XM\_006628721.2;  
*Cyp26A1*LG5: XM\_015346535.1; *Cyp26B1*-LG5: XM\_015346536.1; *Cyp26B1*-LG4: XM\_006629094.2  
  
 West indian coelacanth (*Latimeria chalumnae*): *Aldh1a1*: XM\_006001663.2;  
*Aldh1a2*: XM\_005998735.2; *Cyp26A1*: XM\_005991554.1; *Cyp26B1*: XM\_005997657.2;  
*Cyp26C1*: XM\_014485862.1  
  
 Whale shark (*Rhincodon typus*): *Aldh1a1*-like: XM\_020527364.2; *Aldh1a2*: XM\_020513964.2;  
*Cyp26A1*: XM\_048608684.1; *Cyp26B1*: XM\_020523106.1; *Cyp26C1*: XM\_020511449.1  
  
 Sea lamprey (*Petromyzon marinus*): *Aldh1a1/a2a* (Chr1): XM\_032949973.1;  
*Aldh1a1/a2b* (Chr40): XM\_032968791.1; *Cyp26A1*: XM\_032952128.1;  
*Cyp26B1/C1a* (Chr11): XM\_032952126.1; *Cyp26B1/C1b* (Chr9): XM\_032950272.1

**Supplementary Figure 9: mRNA accession numbers used for synteny analysis.** mRNA accession numbers of *Cyp26* and *Aldh1a* used to conduct the synteny analyses in different vertebrate models.

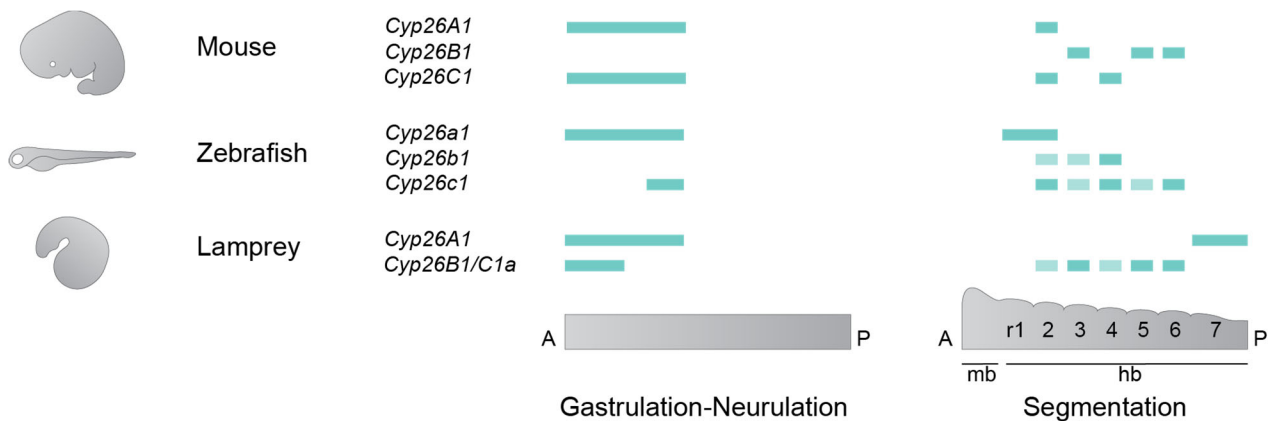

**Supplementary Figure 10: comparison of *Cyp26* expression developmental dynamics in different vertebrates.** Schematic representation of the dynamic changes in *Cyp26* expression during early processes of development (gastrulation-neurulation) and during hindbrain segmentation in mouse, zebrafish and lamprey, illustrating both similarities and differences between orthologues.

| Species               | Exons   | AA     |
|-----------------------|---------|--------|
| <i>Pm Cyp26A1</i>     | 7 exons | 497 AA |
| <i>Pm Cyp26B1/C1a</i> | 6 exons | 529 AA |
| <i>Pm Cyp26B1/C1b</i> | 6 exons | 634 AA |
| <i>Eb Cyp26 06909</i> | 6 exons | 468 AA |
| <i>Eb Cyp26 10538</i> | 6 exons | 528 AA |

**Supplementary Table 1: Cyp26 gene structure and protein length in cyclostomes.** *Pm*, *Petromyzon marinus* (sea lamprey); *Eb*, *Eptatretus burgeri* (inshore hagfish); AA. Amino-acid.

| Species | <i>Cyp26A1</i> | <i>Cyp26A1</i> | <i>Cyp26B1</i> | <i>Cyp26B1</i> | <i>Cyp26C1</i> | <i>Cyp26C1</i> |
|---------|----------------|----------------|----------------|----------------|----------------|----------------|
| Mm      | 7 exons        | 497 AA         | 6 exons        | 512 AA         | 6 exons        | 518 AA         |
| Oa      | NF             |                | 6 exons        | 511 AA         | 6 exons        | 571 AA         |
| Lo      | 7 exons        | 492 AA         | 6 exons        | 511 AA         | 6 exons        | 554 AA         |
| Lc      | 7 exons        | 493 AA         | 6 exons        | 511 AA         | 6 exons        | 634 AA         |
| Rt      | 7 exons        | 494 AA         | 6 exons        | 511 AA         | NF             |                |
| Cc      |                |                |                |                | 6exons         | 560 AA         |

**Supplementary Table 2: Cyp26 gene structure and protein length in jawed vertebrates.** *Mm*, *Mus musculus* (mouse); *Oa*, *Ornithorhynchus anatinus* (platypus); *Lo*, *Lepisosteus oculatus* (spotted gar); *Lc*, *Latimeria chalumnae* (coelacanth); *Rt*, *Rhincodon typus* (whale shark); *Cc*, *Carcharodon carcharias* (great white shark); NF: not found; AA. Amino-acid.

| Species               | Exons | AA              |
|-----------------------|-------|-----------------|
| <i>Pm Aldh1a1/a2a</i> | 13    | 520 AA          |
| <i>Pm Aldh1a1/a2b</i> | 13    | 512AA or 459 AA |
| <i>Eb Aldh1a1</i>     | 13    | 515 AA          |

**Supplementary Table 3: Aldh1a gene structure and protein length in cyclostomes.** *Pm*, *Petromyzon marinus* (sea lamprey); *Eb*, *Eptatretus burgeri* (inshore hagfish); AA. Amino-acid.

| Species | <i>Aldh1a1</i> | <i>Aldh1a1</i>   | <i>Aldh1a2</i> | <i>Aldh1a2</i>   |
|---------|----------------|------------------|----------------|------------------|
| Mm      | 13 exons       | 501 AA           | 13 exons       | 518 AA           |
| Oa      | 13 exons       | 511 AA           | 13 exons       | 518 AA or 422 AA |
| Lo      | 13 exons       | 519 AA or 527 AA | 13 exons       | 518 AA           |
| Lc      | 13 exons       | 514              | 13 exons       | 518 AA or 422 AA |
| Rt      | 13 exons       | 510 or 537 AA    | 13 exons       | 518 AA           |

**Supplementary Table 4: Aldh1a gene structure and protein length in jawed vertebrates.** *Mm*, *Mus musculus* (mouse); *Oa*, *Ornithorhynchus anatinus* (platypus); *Lo*, *Lepisosteus oculatus* (spotted gar); *Lc*, *Latimeria chalumnae* (coelacanth); *Rt*, *Rhincodon typus* (whale shark); AA. Amino-acid.



| Gene                        | Accession Number | Probe set size | Amplifier/AlexaFluor | Average Probe Concentration |
|-----------------------------|------------------|----------------|----------------------|-----------------------------|
| <i>Aldh1a1/a2a</i>          | LOC116940317     | 19             | B3-488               | 6 nM                        |
| <i>Cyp26A1</i>              | LOC116941264     | 23             | B4-546               | 5 nM                        |
| <i>Cyp26B1/C1a</i>          | LOC116941263     | 22             | B1-647               | 5 nM                        |
| <i>krox20 (egr1)</i>        | LOC116940673     | 18             | B3-488               | 6 nM                        |
| <i>kreisler (mafB-like)</i> | LOC116954108     | 12             | B4-546               | 11 nM                       |
| <i>hoxβ1</i>                | LOC103091820     | 13             | B1-647               | 8 nM                        |

**Supplementary Table 5: HCR FISH probe set design.** Summary of the probe set design obtained for each gene targeted by FISH HCR; nM: nanomolar.

| name   | 5'--> 3' sequence     | description               | product size |
|--------|-----------------------|---------------------------|--------------|
| A1_H_F | TACAGCATCAAGGAGACGCA  | Cyp26A1_H helix           | 405 bp       |
| A1_H_R | CGTCTTGTGCTGGCATAAATG |                           |              |
| A1_I_F | GCTGAGACAAAGCGGGAAAG  | Cyp26A1_I helix           | 568 bp       |
| A1_I_R | CCAGGCGAGGGAGATAACAT  |                           |              |
|        |                       |                           |              |
| name   | 5'--> 3' sequence     | description               | product size |
| C1_H_F | GGAGCGTCCTCTACAGCATC  | Cyp26C1_H helix           | 480 bp       |
| C1_H_R | CTCCTCCGTCTCTCTGTCGT  |                           |              |
|        |                       |                           |              |
| name   | 5'--> 3' sequence     | description               | product size |
| Glu_F  | TGGCGGTCGATTCTTCTCTT  | Glutamate site genotyping | 360 bp       |
| Glu_R  | TATTGGCTGCGCAATCTCAC  |                           |              |
| Cys_F  | ATATACAGCAGGCGTCAGGG  | Cysteine site genotyping  | 355 bp       |
| Cys_R  | CGCACGAACTCGTCGTAGA   |                           |              |

**Supplementary Table 6: Primers for CRISPR genotyping.** Primers used for genotyping targeted regions in CRISPR embryo; F: Forward, R: Reverse.
